# Supplementary material for: Caregivers’ compliance with referral advice: evidence from two studies introducing mRDTs into community case management of malaria in Uganda
Source: PubMed Central journal article supplement (PMC5932808; doi:10.1186/s12913-018-3124-8), 2018-05-02

Fig S1: Treatment flow chart for CHWs a) Intervention arm, b) Control arm

a)

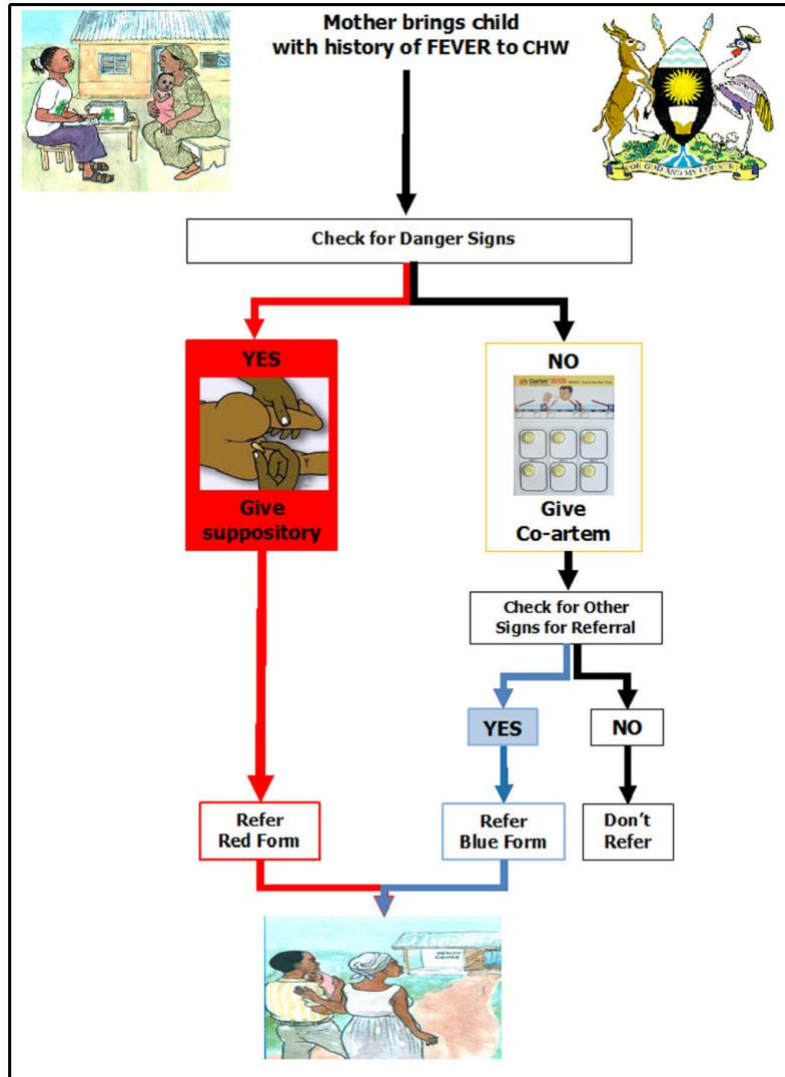

b)

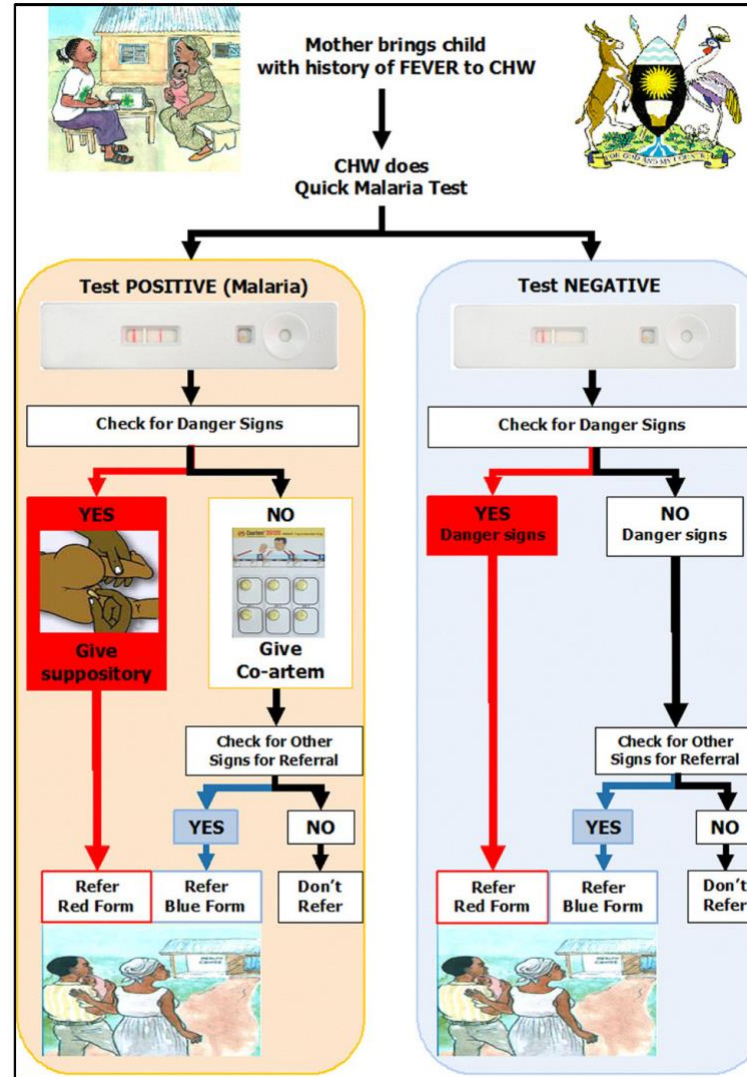

Supplement: 12913_2018_3124_MOESM1_ESM.pdf [file 12913_2018_3124_MOESM1_ESM.pdf]
