# Supplementary material for: Caregivers’ compliance with referral advice: evidence from two studies introducing mRDTs into community case management of malaria in Uganda
Source: Springer Nature journal article supplement (doi:10.1186/s12913-018-3124-8), 2018-05-02
Supplement: MOESM4 [file 15733284]

**Table S3: Diagnoses of children made at health centres for children complying with CHW referral advice in the moderate-to-high transmission setting**

| <b>Diagnoses made by health centre staff</b> | <b>Total Frequency (%)<sup>a</sup></b> | <b>Not tested with mRDT at health centre Frequency (%)</b> | <b>Tested with mRDT at health centre Frequency (%)</b> | <b>mRDT test result: Positive Frequency (%)</b> | <b>mRDT test result: Negative Frequency (%)</b> |
|----------------------------------------------|----------------------------------------|------------------------------------------------------------|--------------------------------------------------------|-------------------------------------------------|-------------------------------------------------|
| Abscess                                      | 1 (0.0)                                | 0 (0.0)                                                    | 1 (100.0)                                              | 0 (0.0)                                         | 1 (100.0)                                       |
| Anaemia                                      | 1 (0.0)                                | 0 (0.0)                                                    | 1 (100.0)                                              | 0 (0.0)                                         | 1 (100.0)                                       |
| Bacterial conjunctivitis                     | 1 (0.0)                                | 0 (0.0)                                                    | 1 (100.0)                                              | 0 (0.0)                                         | 1 (100.0)                                       |
| Burns                                        | 2 (0.0)                                | 0 (0.0)                                                    | 2 (100.0)                                              | 0 (0.0)                                         | 2 (100.0)                                       |
| Diarrhoea                                    | 28 (0.1)                               | 2 (7.1)                                                    | 26 (92.9)                                              | 0 (0.0)                                         | 26 (100.0)                                      |
| Ear wound                                    | -                                      | -                                                          | -                                                      | -                                               | -                                               |
| Epilepsy                                     | 1 (0.0)                                | 0 (0.0)                                                    | 1 (100.0)                                              | 0 (0.0)                                         | 1 (100.0)                                       |
| Epistaxis                                    | -                                      | -                                                          | -                                                      | -                                               | -                                               |
| Eye infection                                | 2 (0.0)                                | 1 (50)                                                     | 1 (50)                                                 | 0 (0.0)                                         | 1 (100.0)                                       |
| Flu                                          | 80 (0.3)                               | 0 (0.0)                                                    | 80 (100.0)                                             | 2 (2.5)                                         | 78 (97.5)                                       |
| Gastroenteritis                              | 1 (0.0)                                | 0 (0.0)                                                    | 1 (100.0)                                              | 0 (0.0)                                         | 1 (100.0)                                       |
| Helminths                                    | 60 (0.2)                               | 1 (1.7)                                                    | 59 (98.3)                                              | 0 (0.0)                                         | 59 (100.0)                                      |
| Malaria                                      | 45 (0.2)                               | 1 (2.2)                                                    | 44 (97.8)                                              | 6 (13.6)                                        | 38 (86.4)                                       |
| Mumps                                        | 3 (0.0)                                | 1 (33.3)                                                   | 2 (66.7)                                               | 0 (0.0)                                         | 2 (100.0)                                       |
| Oral candidiasis                             | 0 (0.0)                                | -                                                          | -                                                      | -                                               | -                                               |
| Otitis media                                 | 1 (0.0)                                | 0 (0.0)                                                    | 1 (100.0)                                              | 0 (0.0)                                         | 1 (100.0)                                       |
| Pneumonia                                    | 11 (0.0)                               | 0 (0.0)                                                    | 11 (100.0)                                             | 3 (27.3)                                        | 8 (72.7)                                        |
| Scalp infection                              | 0 (0.0)                                | -                                                          | -                                                      | -                                               | -                                               |
| Skin infection                               | 5 (0.0)                                | 0 (0.0)                                                    | 5 (100.0)                                              | 0 (0.0)                                         | 5 (100.0)                                       |
| Toe wound                                    | 1 (0.0)                                | 0 (0.0)                                                    | 1 (100.0)                                              | 0 (0.0)                                         | 1 (100.0)                                       |
| Trachoma                                     | 2 (0.0)                                | 0 (0.0)                                                    | 2 (100.0)                                              | 0 (0.0)                                         | 2 (100.0)                                       |
| Trauma                                       | 1 (0.0)                                | 0 (0.0)                                                    | 1 (100.0)                                              | 0 (0.0)                                         | 1 (100.0)                                       |
| Ulcer                                        | 1 (0.0)                                | 0 (0.0)                                                    | 1 (100.0)                                              | 0 (0.0)                                         | 1 (100.0)                                       |
| Urinary tract infection                      | 1 (0.0)                                | 0 (0.0)                                                    | 1 (100.0)                                              | 0 (0.0)                                         | 1 (100.0)                                       |
| Vomiting                                     | 1 (0.0)                                | 0 (0.0)                                                    | 1 (100.0)                                              | 0 (0.0)                                         | 1 (100.0)                                       |
| <b>Total diagnoses</b>                       | <b>249</b>                             | <b>6 (2.4)</b>                                             | <b>243 (97.6)</b>                                      | <b>11 (4.5)</b>                                 | <b>232 (95.5)</b>                               |

<sup>a</sup> Column percentages are reported for the totals.
