# Supplementary material for: Caregivers’ compliance with referral advice: evidence from two studies introducing mRDTs into community case management of malaria in Uganda
Source: Springer Nature journal article supplement (doi:10.1186/s12913-018-3124-8), 2018-05-02
Supplement: MOESM5 [file 15733284]

**Table S4: Diagnoses of children made at health centres for children complying with CHW referral advice in the low transmission setting**

| <b>Diagnoses made by health centre staff</b> | <b>Total Frequency (%)<sup>a</sup></b> | <b>Not tested with mRDT at health centre Frequency (%)</b> | <b>Tested with mRDT at health centre Frequency (%)</b> | <b>mRDT test result: Positive Frequency (%)</b> | <b>mRDT test result: Negative Frequency (%)</b> |
|----------------------------------------------|----------------------------------------|------------------------------------------------------------|--------------------------------------------------------|-------------------------------------------------|-------------------------------------------------|
| Abscess                                      | (0.0)                                  | -                                                          | -                                                      | -                                               | -                                               |
| Anaemia                                      | (0.0)                                  | -                                                          | -                                                      | -                                               | -                                               |
| Bacterial conjunctivitis                     | (0.0)                                  | -                                                          | -                                                      | -                                               | -                                               |
| Burns                                        | (0.0)                                  | -                                                          | -                                                      | -                                               | -                                               |
| Diarrhoea                                    | 10 (10.0)                              | 4 (40.0)                                                   | 6 (60.0)                                               | 0 (0.0)                                         | 6 (100.0)                                       |
| Ear wound                                    | 1 (1.0)                                | 0 (0.0)                                                    | 1 (100.0)                                              | 0 (0.0)                                         | 1 (100.0)                                       |
| Epilepsy                                     | (0.0)                                  | -                                                          | -                                                      | -                                               | -                                               |
| Epistaxis                                    | 1 (1.0)                                | 0 (0.0)                                                    | 1 (100.0)                                              | 0 (0.0)                                         | 1 (100.0)                                       |
| Eye infection                                | (0.0)                                  | -                                                          | -                                                      | -                                               | -                                               |
| Flu                                          | 63 (63.0)                              | 15 (23.8)                                                  | 48 (76.2)                                              | 1 (2.1)                                         | 47 (97.9)                                       |
| Gastroenteritis                              | 1 (1.0)                                | 0 (0.0)                                                    | 1 (100.0)                                              | 0 (0.0)                                         | 1 (100.0)                                       |
| Helminths                                    | 1 (1.0)                                | 0 (0.0)                                                    | 1 (100.0)                                              | 0 (0.0)                                         | 1 (100.0)                                       |
| Malaria                                      | 9 (9.0)                                | 2 (22.2)                                                   | 7 (77.8)                                               | 2 (28.6)                                        | 5 (71.4)                                        |
| Mumps                                        | (0.0)                                  | -                                                          | -                                                      | -                                               | -                                               |
| Oral candidiasis                             | 1 (1.0)                                | 1 (100.0)                                                  | 0 (0.0)                                                | -                                               | -                                               |
| Otitis media                                 | 1 (1.0)                                | 0 (0.0)                                                    | 1 (100.0)                                              | 0 (0.0)                                         | 1 (100.0)                                       |
| Pneumonia                                    | 8 (8.0)                                | 2 (25.0)                                                   | 6 (75.0)                                               | 0 (0.0)                                         | 6 (100.0)                                       |
| Scalp infection                              | (0.0)                                  | -                                                          | -                                                      | -                                               | -                                               |
| Skin infection                               | 1 (1.0)                                | 1 (100.0)                                                  | 0 (0.0)                                                | -                                               | -                                               |
| Toe wound                                    | (0.0)                                  | -                                                          | -                                                      | -                                               | -                                               |
| Trachoma                                     | (0.0)                                  | -                                                          | -                                                      | -                                               | -                                               |
| Trauma                                       | (0.0)                                  | -                                                          | -                                                      | -                                               | -                                               |
| Ulcer                                        | (0.0)                                  | -                                                          | -                                                      | -                                               | -                                               |
| Urinary tract infection                      | 3 (3.0)                                | 3 (100.0)                                                  | 0 (0.0)                                                | -                                               | -                                               |
| Vomiting                                     | (0.0)                                  | -                                                          | -                                                      | -                                               | -                                               |
| <b>Total diagnoses</b>                       | <b>100</b>                             | <b>28 (28.0)</b>                                           | <b>72 (72.0)</b>                                       | <b>3 (4.2)</b>                                  | <b>69 (95.8)</b>                                |

<sup>a</sup> Column percentages are reported for the totals.
